# Supplementary material for: MR-Class: A Python Tool for Brain MR Image Classification Utilizing One-vs-All DCNNs to Deal with the Open-Set Recognition Problem
Source: MDPI journal article supplement (doi:10.3390/cancers15061820), 2023-03-17
Supplement: s1 [file s1]

**Supplementary-Table S1.** State of the art method specifications

| <b>Paper/method</b>       | $\Phi$ -Net Remedios et al. (2018) [16]                                                | Ayyachamy et al. (2019) [15]                                         | DeepDicomSort van der Voort et al. (2021) [17]                                                                 | Qayyum et al. (2017) [14]       |
|---------------------------|----------------------------------------------------------------------------------------|----------------------------------------------------------------------|----------------------------------------------------------------------------------------------------------------|---------------------------------|
| <b>Classes type</b>       | 5 MR image contrasts                                                                   | 23 body parts                                                        | 8 MR image contrasts                                                                                           | 24 body parts                   |
| <b>Scanners and sites</b> | 5 MR scanners and 4 sites                                                              | MRI and CT                                                           | Experiment 1: 29 scanners from 17 sites<br>15 scanners from 8 sites<br>Experiment 2: 23 scanners from 67 sites | MR, CT, PET, PT, OPT            |
| <b>No. of images</b>      | Training: 2137<br>Testing: 1281                                                        | Training: 21632<br>Validation: 9418<br>Testing: 5613                 | Experiment 1 –<br>Training: 11065,<br>Testing: 2369<br>Experiment 2 –<br>Training: 7227 scans                  | Training: 5040<br>Testing: 2160 |
| <b>Patients</b>           | Healthy, traumatic brain injury, hypertension, multiple sclerosis, Alzheimer's disease | Chest, colon, esophagus, lung, liver, brain, prostate, head and neck | Experiment 1: Glioblastoma, brain neoplasia, other brain tumors<br>Experiment 2: Alzheimer's disease           | Lung, brain, liver, knee        |

| CNN architecture                                                      | Borrows skip connections from 3D ResNet                                               | Pre-trained ResNet-18                                                                  | Inspired by the VGG network                                                                                                                         | DCNN                                                                            |
|-----------------------------------------------------------------------|---------------------------------------------------------------------------------------|----------------------------------------------------------------------------------------|-----------------------------------------------------------------------------------------------------------------------------------------------------|---------------------------------------------------------------------------------|
| <b>Cascaded architecture</b><br><b>For contrast agent enhancement</b> | yes                                                                                   | no                                                                                     | no                                                                                                                                                  | no                                                                              |
| <b>Preprocessing</b>                                                  | Neck removal, resampling (2x2x2), intensity normalization 99 <sup>th</sup> percentile | Resize to 256x256, 0-1 intensity normalized, tumor slice selection + 5 adjacent slices | NIfTI conversion, 3D dimension check, reorientation, resampling (256x256x256), slices extraction, 0-1 intensity normalization, no data augmentation | Resampling (256x256), color images converted to grayscale, no data augmentation |
| <b>Accuracy</b>                                                       | 97.6%                                                                                 | 92%                                                                                    | 98.7%                                                                                                                                               | 99.7%                                                                           |
| <b>Deals with the open set recognition problem</b>                    | No                                                                                    | No                                                                                     | No                                                                                                                                                  | No                                                                              |

**Supplementary-Table S2.** Patient demographics of the data cohorts considered in this study

|                          | Dataset I | Dataset II | Dataset III |
|--------------------------|-----------|------------|-------------|
| <b>Patients</b>          | 320       | 197        | 256         |
| <b>Gender</b>            |           |            |             |
| Male                     | 196       | 120        | 155         |
| Female                   | 124       | 77         | 101         |
| <b>Age</b>               |           |            |             |
| <50                      | 104       | 84         | 50          |
| 50-69                    | 167       | 105        | 145         |
| >=70                     | 49        | 8          | 61          |
| <b>Tumor grade</b>       |           |            |             |
| III                      | 73        | 71         | 0           |
| IV                       | 247       | 126        | 255         |
| <b>Radiation therapy</b> |           |            |             |
| No                       | 0         | 0          | 113         |
| Yes                      | 320       | 197        | 143         |
| <b>Tumor resection</b>   |           |            |             |
| yes                      | 240       | 25         | 0           |
| No                       | 10        | 172        | 0           |
| NR                       | 70        | 0          | 256         |

**Supplementary-Table S3:** MR scanner models found in the cohorts

| Dataset    | Manufacturer | Tesla | Model                                                |
|------------|--------------|-------|------------------------------------------------------|
| <b>I</b>   | Siemens      | 0.35  | Open                                                 |
|            |              | 1     | Allegra, Harmony                                     |
|            |              | 1.5   | Aera, Amira, Avanto, Espree, Sonata Symphony, Vision |
|            |              | 3     | Prisma fit, Skyra, Trio, TrioTim, Verio              |
|            | Philips      | 1     | Panorama                                             |
|            |              | 1.5   | Achieva, Ingenia, Intera, NT                         |
|            |              | 3     | NT                                                   |
| <b>II</b>  | GE           | 1.5   | Signa, Signa Excite-HDxt                             |
|            | Siemens      | 1     | Harmony                                              |
|            |              | 1.5   | Avanto, Aera, Espree, Sonata, Symphony               |
|            |              | 3     | Prisma fit, Skyra, TrioTim, Verio                    |
|            | Philips      | 1.5   | Achieva, Ingenia, Intera                             |
|            | GE           | 1.5   | Optima MR450w, Signa HDxt                            |
| <b>III</b> | Siemens      | 1.5   | Avanto, Espree, Sonata, Symphony                     |
|            |              | 3     | Verio, Trio, TrioTrim                                |
|            | Philips      | 0.5   | T5                                                   |
|            |              | 1.5   | Achieva, Intera                                      |
|            | GE           | 1.5   | Signa, Signa Excite-HDx-HDxt                         |
|            | Hitachi      | 0.3   | Airis II                                             |
|            |              |       |                                                      |

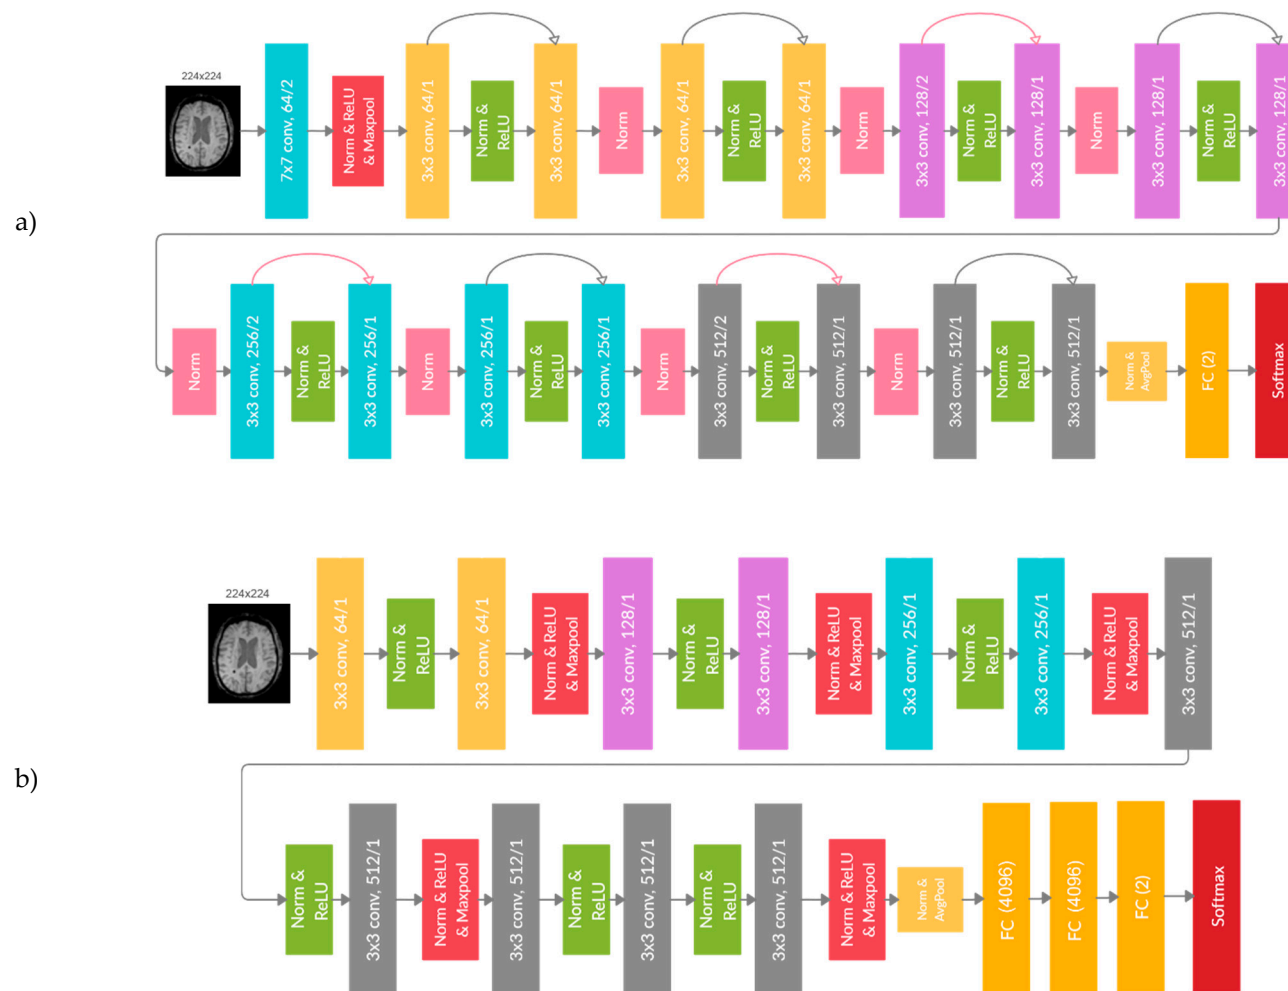

**Supplementary-Figure S1:** An example of ResNet and VGG architectures with 18 and 16 layers, and two output neurons. FC (2) represents a fully-connected layer with the two output neurons. a) ResNet-18 architecture. Stack of 3x3 convolutional layers, activations layers, and pooling layers. The skip connections, represented with arrows, fit the unmodified

input from the previous layer to the next layer, preserving the original image signal. A softmax layer is appended to the FC layer to produce probabilistic predictions of the classes.

b) VGG-16 architecture. Stack of 3x3 convolutional layers, activations layers, and pooling layers, followed by FC output layers

**Supplementary-Table S4:** Nr. of series descriptions (SD) found for each class

|             | n    |      |      | Nr of series description |     |     |
|-------------|------|------|------|--------------------------|-----|-----|
|             | I    | II   | III  | I                        | II  | III |
| Pre-CA T1w  | 2023 | 1189 | 433  | 1105                     | 184 | 120 |
| Post-CA T1w | 1917 | 4315 | 1096 | 1060                     | 464 | 158 |
| T2w         | 1970 | 630  | 347  | 383                      | 126 | 88  |
| T2w-FLAIR   | 1919 | 811  | 389  | 223                      | 122 | 63  |
| ADC         | 1938 | 895  | 122  | 125                      | 78  | 23  |
| SWI         | 1479 | 486  | -    | 61                       | 8   | -   |

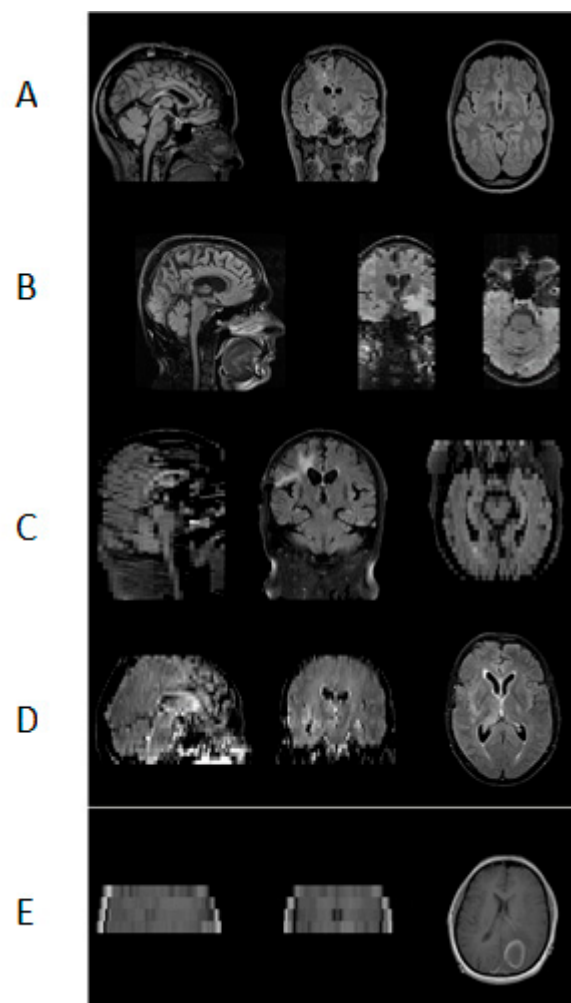

**Supplementary-Figure S2:** (A) a 3D reconstructed MR scan correctly classified by both the 2D and 3D CNNs. The remaining images are samples correctly classified by the 2D CNNs but misclassified by the 3D CNNs, specifically conventional 2D (B) axial, (C) sagittal (D) coronal acquired scans or (E) scans with field of views that only encompassed the tumor area

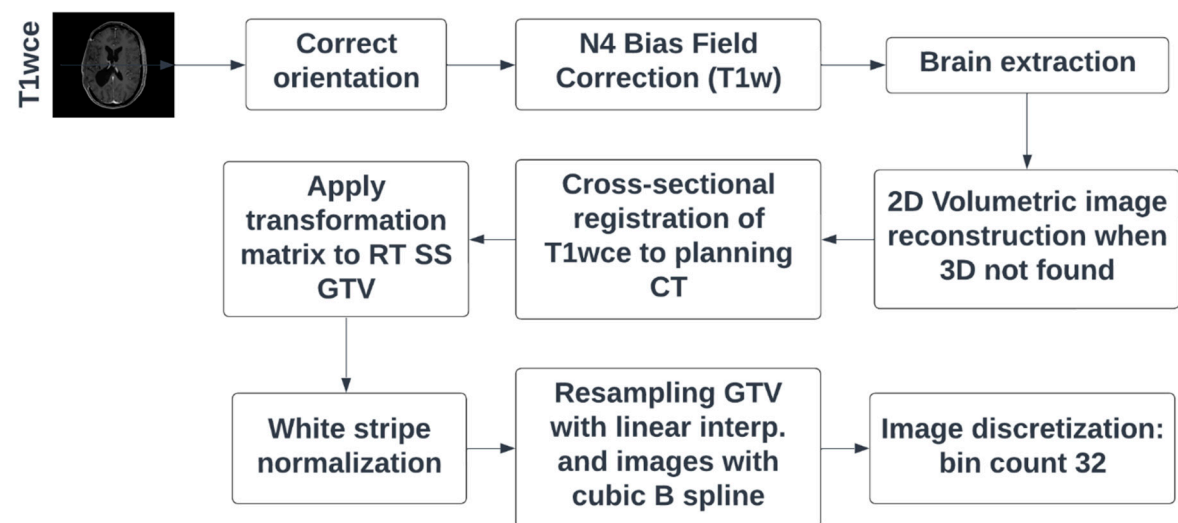

**Supplementary-Figure S3:** T1wce preprocessing diagram applied before survival prediction modeling.. RT SS GTV represents the gross tumor volume segmentation extracted from the DICOM RT structure set.



**Supplementary-Table S5.** The number of shape, first and second-order statistics derived per sequence and calculated on both the original and derived images.

| Class                                    | No. features |
|------------------------------------------|--------------|
| <b>First-order statistics</b>            | 19           |
| <b>Shape-based (3D)</b>                  | 16           |
| <b>Second-order statistics</b>           |              |
| Gray Level Co-occurrence Matrix          | 24           |
| Gray Level Run Length Matrix             | 16           |
| Gray Level Size Zone Matrix              | 16           |
| Neighbouring Gray Tone Difference Matrix | 5            |
| Gray Level Dependence Matrix             | 14           |
